# Supplementary material for: Evaluating General Practitioner attitudes towards Screening, Risk Assessment, and Diagnosis of Periodontal Disease and Tooth Wear in the UK and Ecuador
Source: Research Square preprint supplement (doi:10.21203/rs.3.rs-6521392/v1), 2025-05-27
Supplement: Supplementary file 1 [file 034305bd7ede8348e5749ef0.docx]

We are undertaking practice-based research here at King’s College London, to investigate trends with the risk assessment, charting and diagnosis of tooth wear and periodontal disease in General Dental Practice. Participation is entirely voluntary. Your contribution and responses will be strictly confidential.

We would be very grateful if you would kindly fill out the questionnaire below.

This questionnaire applies to you if you are a general dentist (non-registered specialist) and relates to your patients who are aged over 18 years old. Please delete the response that does not apply. This should not take you very long at all.

Your return of the filled form will imply your consent for your responses to be included into this anonymised study. You will not be able to withdraw from participation from this study once this sheet has been returned to us.

If you require any clarification then please do not hesitate to contact either, subir.banerji@kcl.ac.uk or shamir.mehta@kcl.ac.uk.

Please return your filled questionnaire to the distributor. Please do not insert any details that will enable identification. Thank you so much for your time and support.

With our best wishes

Subir & Shamir

Dr Subir Banerji Dr Shamir Mehta

1. How long have you been in practice? ………………. yrs.
2. Do you routinely undertake risk assessments for periodontal disease for adult dental patients during a dental examination appointment? Yes/No.
3. If you have answered ‘no’ to question 2, please indicate your reason(s) with a response to each statement listed below.

- You do not think it is relevant - Yes/No
- Insufficient time – Yes/ No
- Lack of funding to undertake this assessment – Yes/No
- Lack of knowledge and training with performing this assessment – Yes/No
- It is not at area which leads to litigation – Yes/ No
- It is not an area of regulatory concern – Yes/No
- Other (Please give details in the box provided below)

1. Do you routinely undertake periodontal probing as part of your screening for periodontal disease for adult dental patients during a dental examination appointment? Yes/No.
2. Only provide an answer to this question if you have answer ‘yes’ to question 4 - do you usually use the Basic Periodontal Examination (BPE) to undertake this assessment? Yes/ No.
3. Do you routinely record a diagnosis for periodontal disease for adult dental patients during a dental examination appointment? Yes/No
4. Do you routinely undertake risk assessments for tooth wear for adult dental patients during a dental examination appointment? Yes/No.
5. If you have answered ‘no’ to question 7, please indicate your reason(s) with a response to each statement listed below.

- You do not think it is relevant - Yes/No
- Insufficient time – Yes/ No
- Lack of funding to undertake this assessment – Yes/No
- Lack of knowledge and training with performing this assessment – Yes/No
- It is not at area which leads to litigation – Yes/ No
- It is not an area of regulatory concern – Yes/No
- Other (Please give details in the box provided below)

1. Do you routinely undertake clinical tooth wear assessment for adult dental patients during a dental examination appointment? Yes/No.
2. Do you routinely use a tooth wear index for scoring and recording levels of wear assessment for adult dental patients during a dental examination appointment? Yes/No.
3. Only provide an answer If you have answer ‘yes’ to question 10 – which type of tooth wear index do you most commonly use,

- The Basic Erosive Wear Examination (BEWE) – Yes/ No
- The Tooth Wear Evaluation System (TWES) – Yes/ No
- The Tooth Wear Index (Smith and Knight) – Yes/ No
- Any other method: Please indicate in the box below

1. Do you routinely record a diagnosis for tooth wear for adult dental patients during a dental examination appointment? Yes/No
2. Periodontal assessment and diagnosis were satisfactorily covered for you during your undergraduate training? DO YOU: strongly agree/ agree/ uncertain/ disagree/ strongly disagree. (Please delete those that do not apply)
3. Tooth wear assessment and diagnosis was satisfactorily covered for you during your undergraduate training. DO YOU: strongly agree/ agree/ uncertain/ disagree/ strongly disagree (Please delete those that do not apply)

Thank you for your time and taking part.
